# Supplementary material for: Hydroquinone-assisted assembly of coordination polymers from lanthanides and cucurbit[5]uril
Source: Royal Society of Chemistry journal article supplement (doi:10.1039/c2ce26200b), 2012-01-01
Supplement: c2ce26200b.pdf [file c2ce26200b.pdf]

# Supporting Information

## Hydroquinone-assisted assembly of coordination polymers from lanthanides and cucurbit[5]uril

Kai Chen,<sup>a</sup> Li-Li Liang,<sup>a</sup> Hao-Jing Liu,<sup>a</sup> Yun-Qian Zhang,<sup>a</sup> Sai-Feng Xue,<sup>a</sup> Zhu Tao,<sup>a</sup> Xin Xiao,<sup>a</sup>  
Qian-Jiang Zhu,<sup>a\*</sup> Leonard F. Lindoy,<sup>b\*</sup> and Gang Wei<sup>c\*</sup>

<sup>a</sup> Key Laboratory of Macrocyclic and Supramolecular Chemistry of Guizhou Province, Guizhou University, Guiyang 550025, People's Republic of China

<sup>b</sup> School of Chemistry, the University of Sydney, NSW 2006, Australia

<sup>c</sup> CSIRO Materials Science and Engineering, P.O. Box 218, Lindfield, NSW 2070, Australia

The detailed bond lengths and distances in the supramolecular assemblies of Q[5] with Lanthanides are showed in SI-Table 1 and SI-Figure 2.

**SI-Table 1** The detailed bond lengths and distances in the supramolecular assemblies of Q[5] with Lanthanides

|    | Ln-O <sub>(carbonyl)</sub> (Å) | Ln-O <sub>(water)</sub> (Å) | H <sub>Ln-plane</sub> (Å) |
|----|--------------------------------|-----------------------------|---------------------------|
| La | 2.540-2.605                    | 2.601-2.605                 | 2.107                     |
| Sm | 2.397-2.404                    | 2.359-2.430                 | 1.889                     |
| Eu | 2.350-2.409                    | 2.360-2.432                 | 1.830-1.866               |
| Gd | 2.354-2.385                    | 2.358-2.436                 | 1.841-1.849               |
| Dy | 2.315-2.371                    | 2.345-2.371                 | 1.828-1.836               |
| Er | 2.302-2.349                    | 2.302-2.337                 | 1.812-1.813               |
| Yb | 2.280-2.335                    | 2.285-2.333                 | 1.785-1.803               |
| Lu | 2.275-2.332                    | 2.286-2.329                 | 1.766-1.813               |

**SI-Table 2** The Water molecules in Compound **1 – 8**: how many water molecules were found on Fourier maps and how many water molecules were introduced with SQUEEZE.

| NO.                     | 1  | 2  | 3  | 4  | 5  | 6  | 7  | 8  |
|-------------------------|----|----|----|----|----|----|----|----|
| All Water molecules     | 14 | 19 | 52 | 58 | 13 | 14 | 16 | 19 |
| Squeeze water molecules | 10 | 8  | 32 | 48 | 9  | 10 | 12 | 15 |
| Final water molecules   | 4  | 11 | 20 | 10 | 4  | 4  | 4  | 4  |

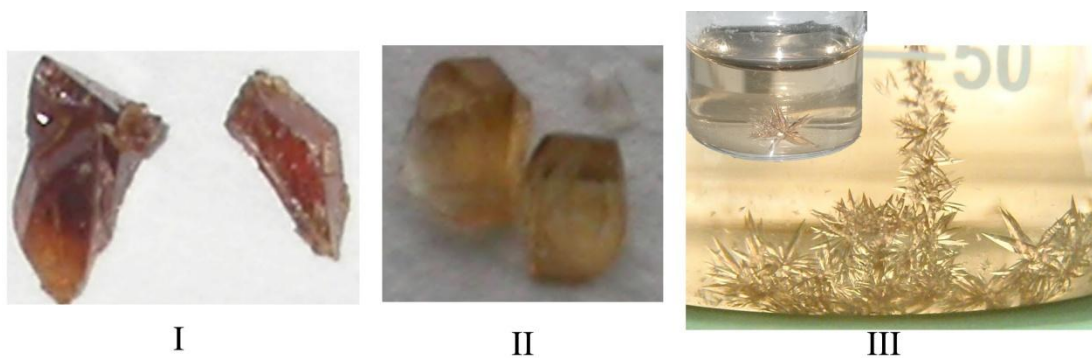

**SI-Figure 1.** The single-crystal photos of compounds corresponding to three different supramolecular assemblies.

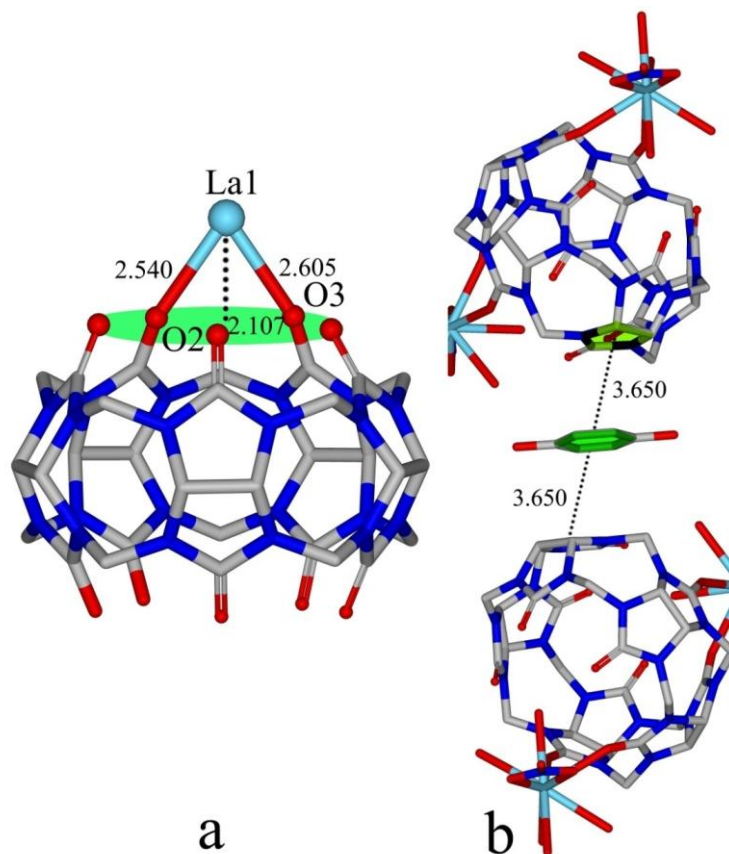

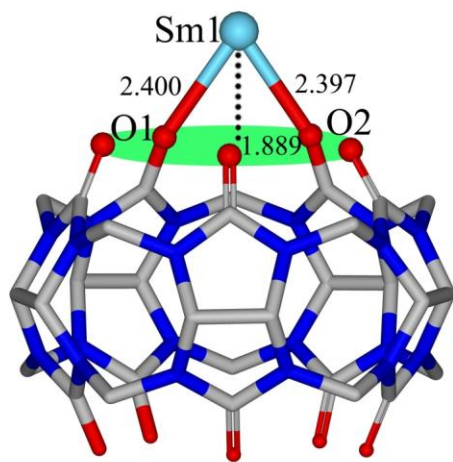

c

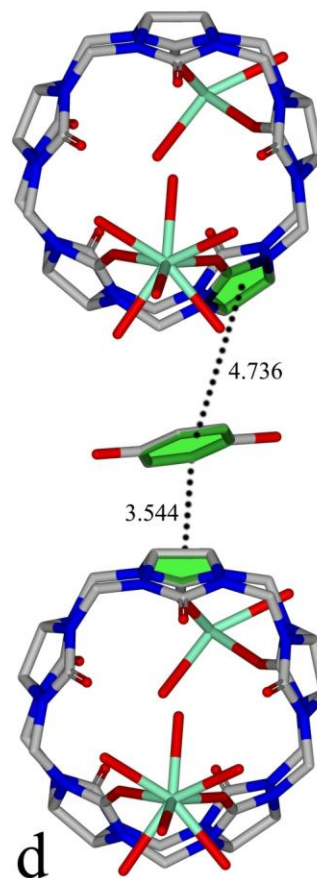

d

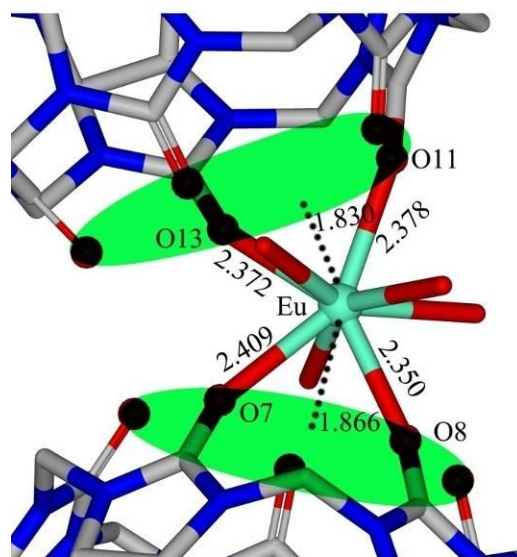

e

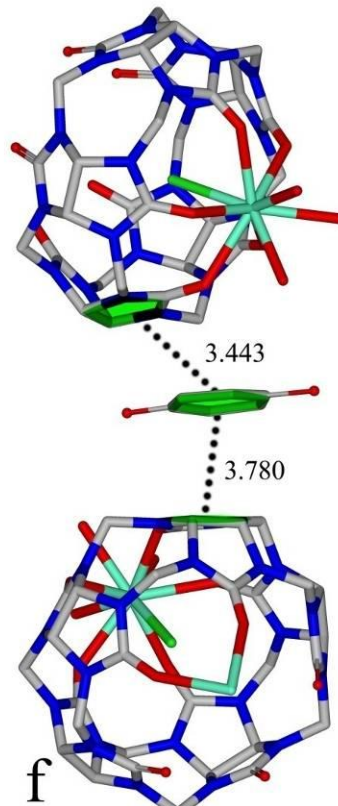

f

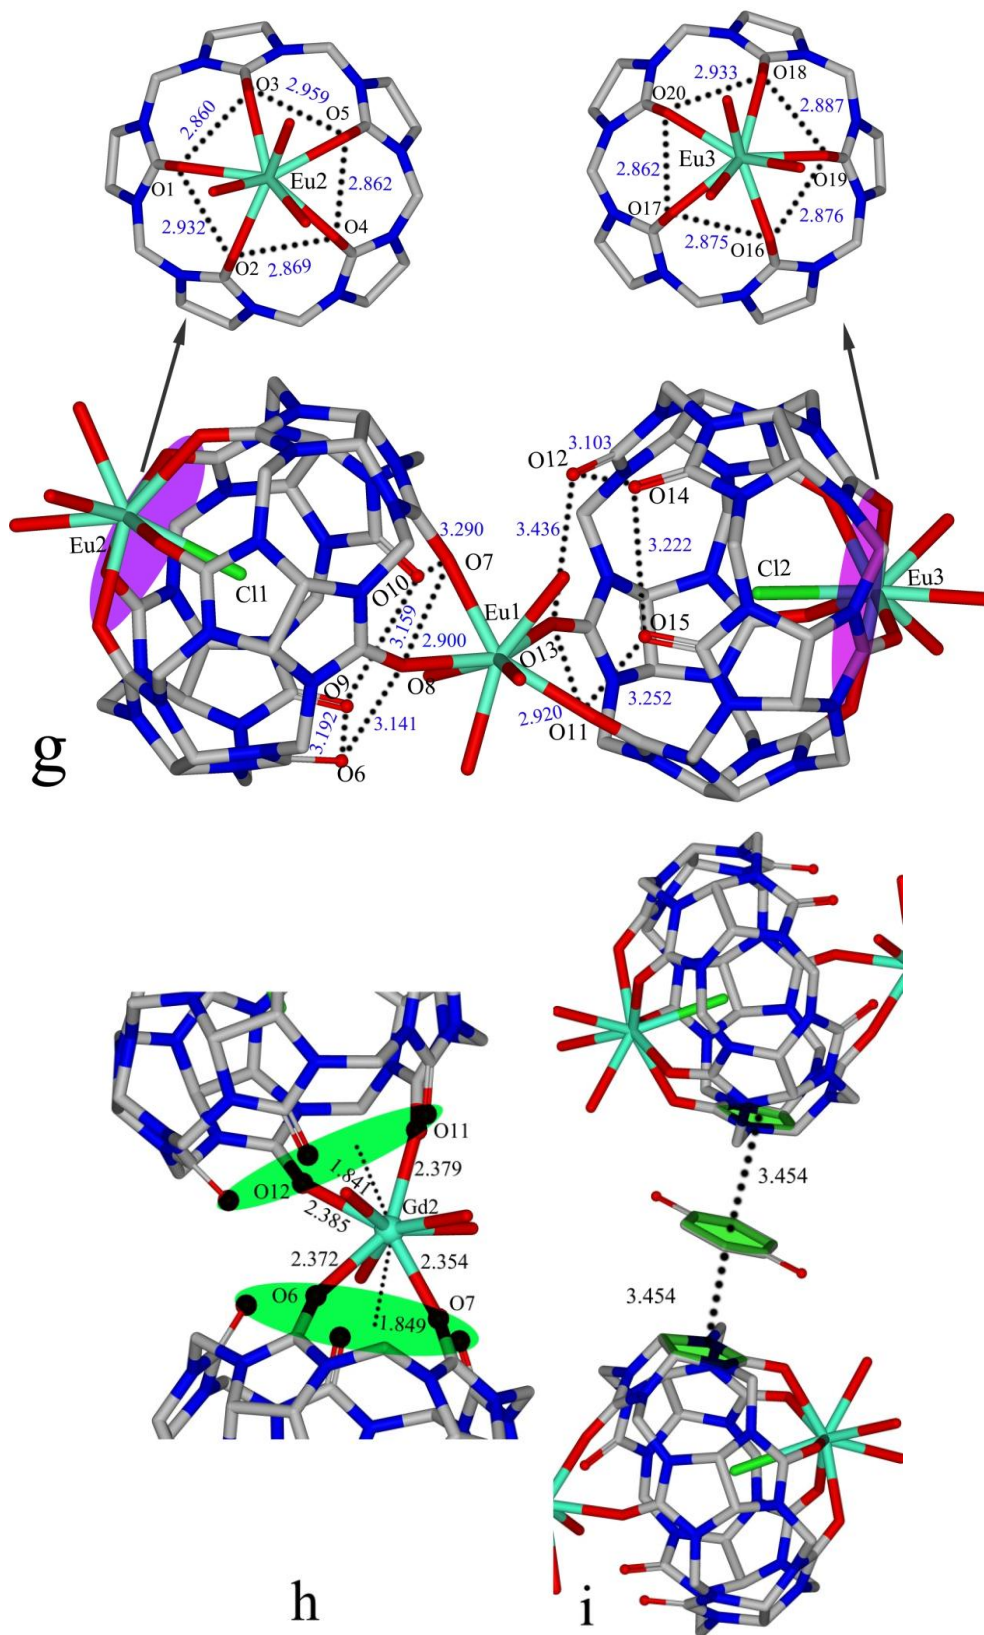

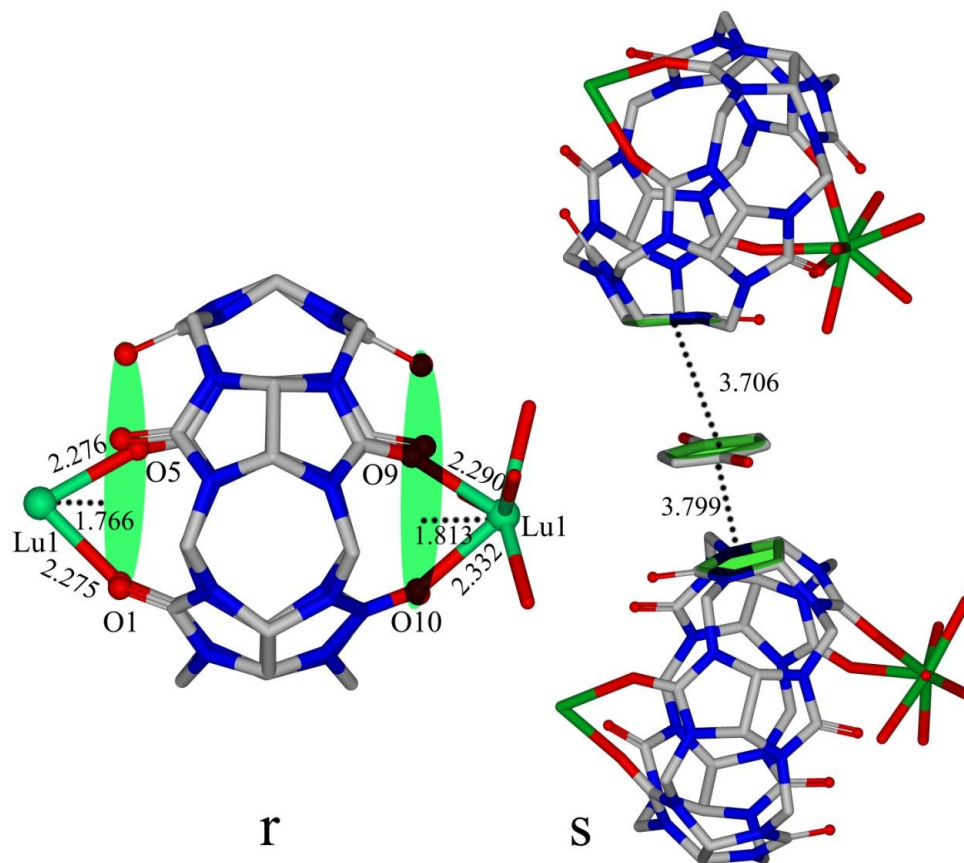

**SI-Figure 2.** The detailed bond lengths and distances in the supramolecular assemblies of Q[5] incorporating lanthanides

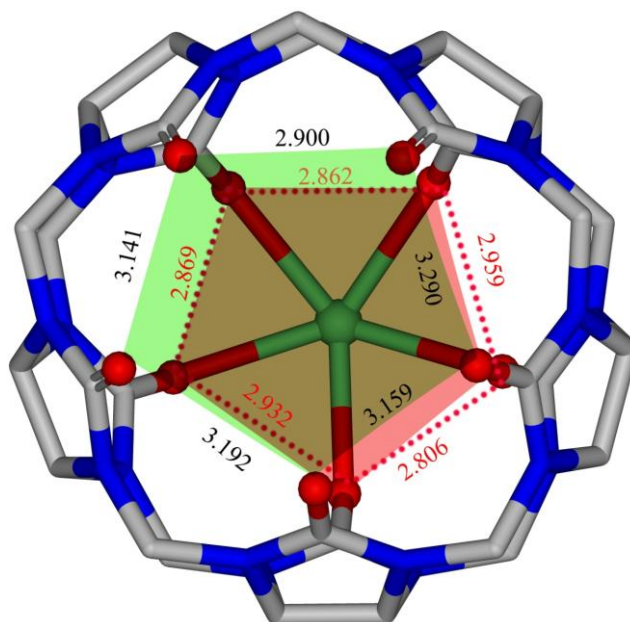

**SI-Figure 3.** Comparison to the two portal sizes of a Q[5] molecule in the Q[5]-pair found in compounds 3 and 4

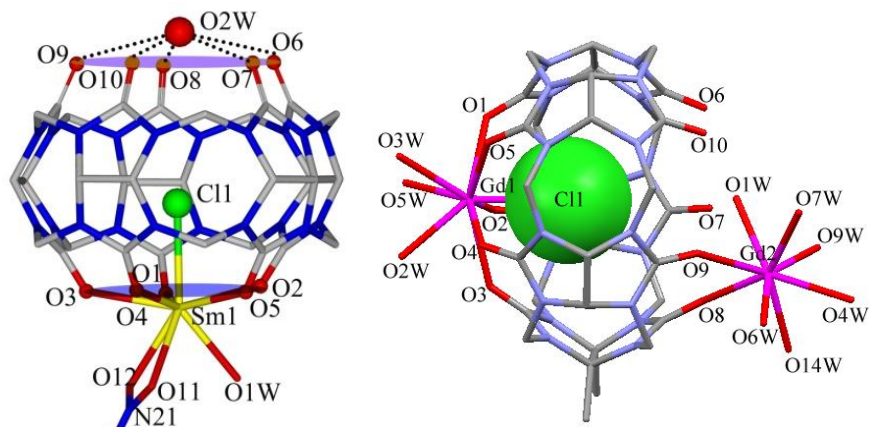

SI-Figure 4 discrete "molecular bowl" and half covered "molecular bowl" of Q[5] molecule with  $\text{Ln}^{3+}$

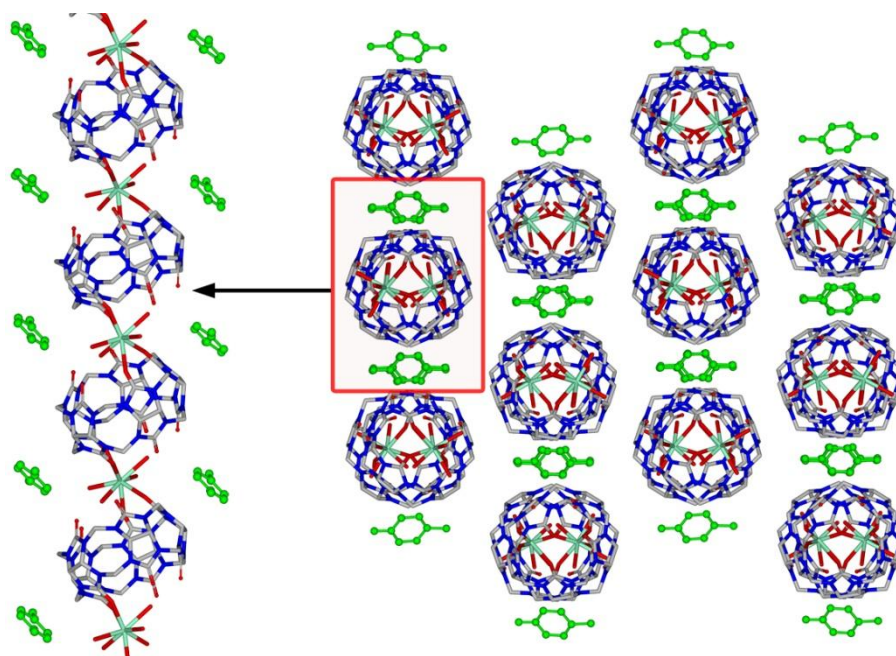

SI-Figure 5 the supramolecular assemblies corresponding to the Q[5]-light lanthanides (Figure3b)

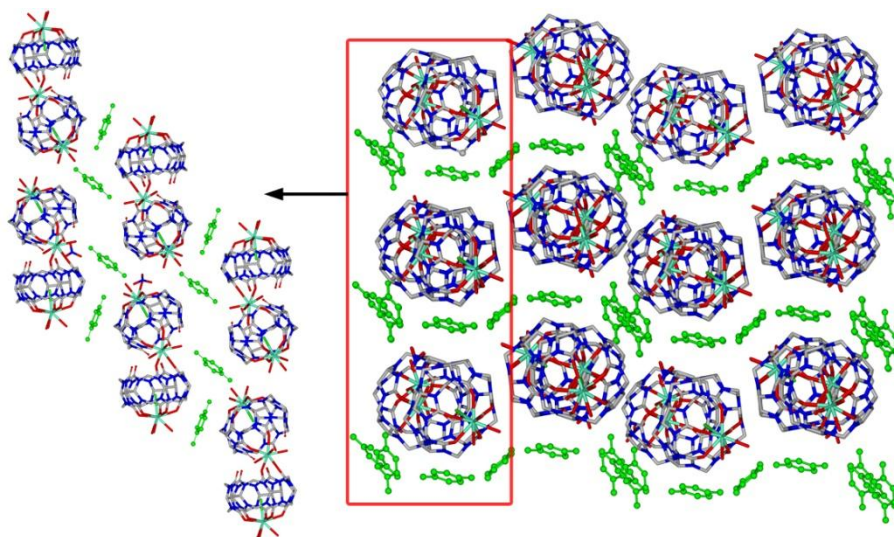

**SI-Figure 6** the supramolecular assemblies corresponding to the Q[5]- moderately heavy lanthanides (Figure3c)

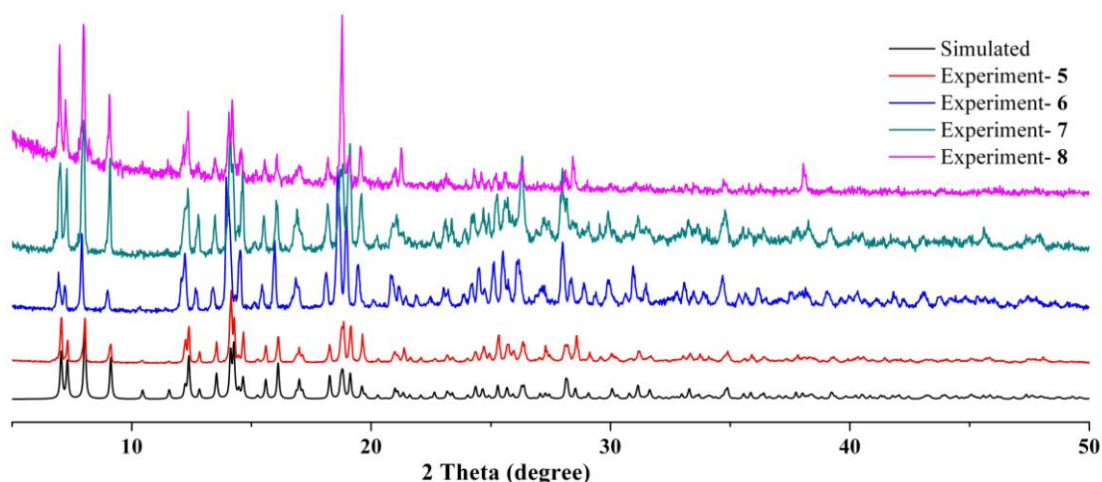

**SI-Figure 7** Powder X-ray diffraction (PXRD) of Complexes 5-8 and a comparison with simulation show that the sample produced is phase pure.

It is well known that the solid-state circular dichroism (CD) spectroscopy is the most effective method to calculate the enantiomeric excess values. However, investigation using solid-state CD spectroscopy in a KBr pellet showed that every single crystal of complexes 5-8 were CD-silent<sup>1</sup>. The result suggests the sample in present case had undergone spontaneous resolution with an enantiomeric excess value of 50%. It should be noted that the enantiomeric excess value of compound 5-8 are stochastic and variable.

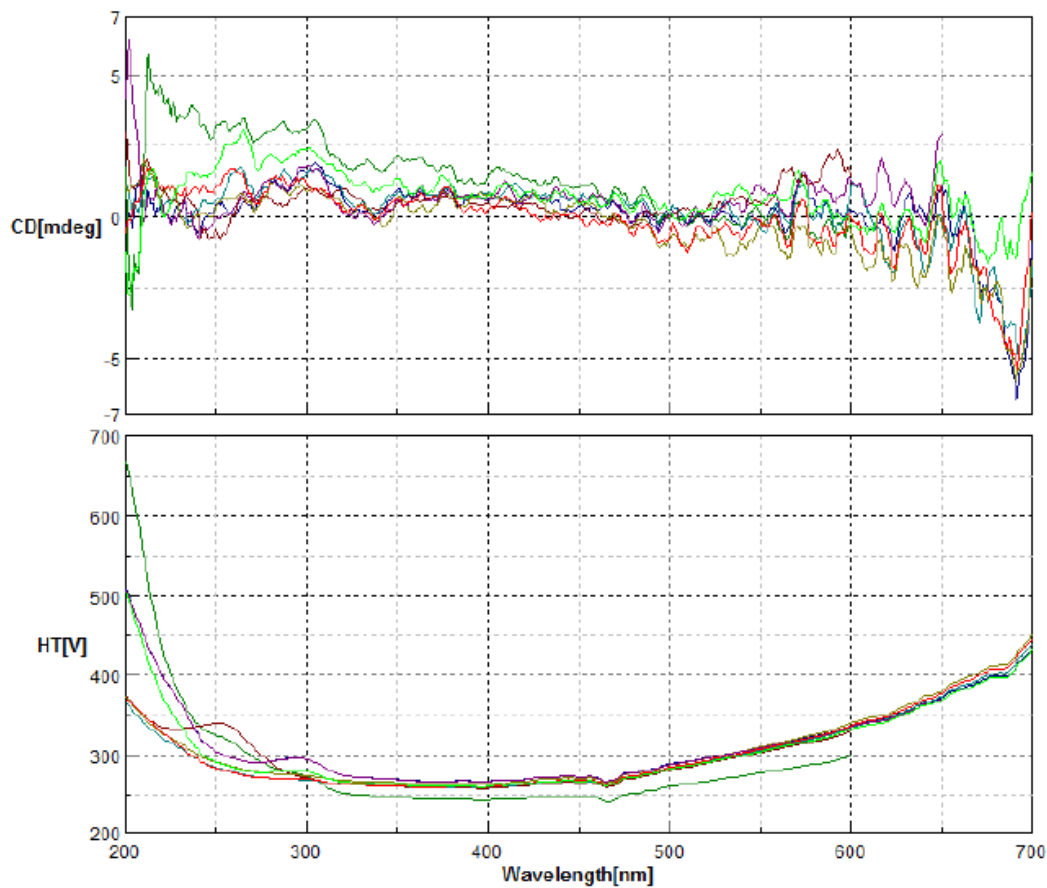

**SI-Figure 7** the solid-state circular dichroism (CD) spectroscopy of complexes 5-8

Reference: 1. K. Chen, Y.-F. Hu, X. Xiao, S.-F. Xue, Z. Tao, Y.-Q. Zhang, Q.-J. Zhu and J.-X. Liu, RSC Adv. 2012, **2**, 3217.
